# Supplementary material for: CBP-mediated acetylation of histone H3 lysine 27 antagonizesDrosophilaPolycomb silencing
Source: Oxford University Press journal article supplement (doi:10.1242/dev.037127), 2009-08-21
Supplement: dev037127supptables1.pdf [file dev037127supptables1.pdf]

**Table S1. CBP overexpression strongly enhances the  $Pc^3$  mutant phenotype**

| Genotype                                  | <i>n</i> | Extra sex combs (%) |     |
|-------------------------------------------|----------|---------------------|-----|
|                                           |          | T2                  | T3  |
| <i>CyO/+; UAS-CBP/Pc<sup>3</sup></i>      | 76       | 65                  | 36  |
| <i>hsp-GAL4/+; Pc<sup>3</sup>/+</i>       | 80       | 59                  | 36  |
| <i>hsp-GAL4/+; UAS-CBP/Pc<sup>3</sup></i> | 82       | 100                 | 100 |

*hsp70-GAL4/CyO; UAS-CBP/UAS-CBP* females were crossed to *Pc<sup>3</sup>/TM3* males at 29°C. The presence of extra sex combs on T2 and T3 legs was scored in *hsp-GAL4/+; UAS-CBP/Pc<sup>3</sup>* males, and *CyO/+; UAS-CBP/Pc<sup>3</sup>* and *hsp-GAL4/+; Pc<sup>3</sup>/+* males (controls).
