# Supplementary material for: CBP-mediated acetylation of histone H3 lysine 27 antagonizesDrosophilaPolycomb silencing
Source: Oxford University Press journal article supplement (doi:10.1242/dev.037127), 2009-08-21
Supplement: dev037127supptables2.pdf [file dev037127supptables2.pdf]

**Table S2. Overexpression of TRX causes Polycomb phenotypes**

| Genotype                   | <i>n</i> | Extra sex combs (%) |    |
|----------------------------|----------|---------------------|----|
|                            |          | T2                  | T3 |
| <i>da-GAL4/+; +/+</i>      | 58       | 0                   | 0  |
| <i>EP3541/EP3541</i>       | 60       | 0                   | 0  |
| <i>da-GAL4/+; EP3541/+</i> | 66       | 92                  | 85 |

*da-GAL4/da-GAL4* females were crossed to *EP3541/EP3541* males at 25°C. The presence of extra sex combs on T2 and T3 legs was scored in *da-GAL4/+; +/+* (control) and *da-GAL4/+; EP3541/+* males. Homozygous *EP3541* adults showed no signs of Polycomb phenotypes.
